# Supplementary material for: Pub1p C-Terminal RRM Domain Interacts with Tif4631p through a Conserved Region Neighbouring the Pab1p Binding Site
Source: PLOS journal article supplement (doi:10.1371/journal.pone.0024481), 2011-09-08

Supplementary figure 2

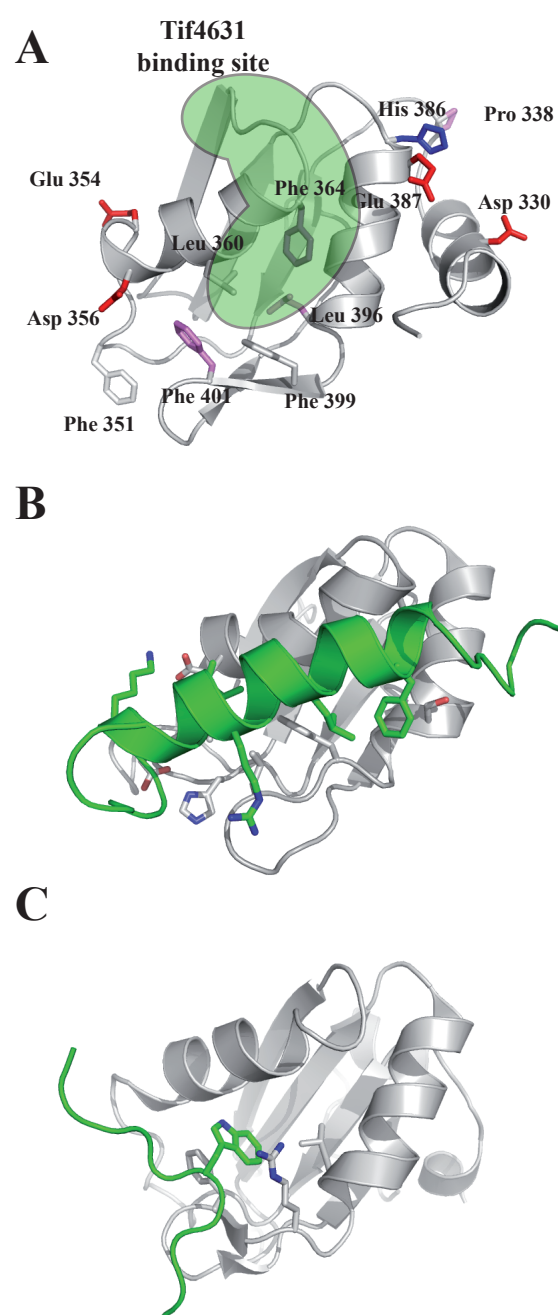

Supplement: S4 (10.1371/journal.pone.0024481.s004) [file journal.pone.0024481.s004]
